# Supplementary material for: Computer-aided simulation and exergy analysis of TiO2 nanoparticles production via green chemistry
Source: PeerJ. 2019 Nov 25;7:e8113. doi: 10.7717/peerj.8113 (PMC6882416; doi:10.7717/peerj.8113)
Supplement: Data S1 [file peerj-07-8113-s001.xlsx]

## Sheet: Data
	Stage	Energy flow (kW)	Exergy-Work (MJ/h)	Heat,in (MJ/h)	Exergy-Heat(MJ/h)	Exergy-Utilities, in (MJ/h)	Exergy-Mass, in (MJ/h)	Total Exergy, in (MJ/h)	Exergy-Products, out (MJ/h)	Irreversibilities (MJ/h)	Exergy loss (%)	Exergy Efficiency (%)	Exergy-Wastes (MJ/h)
	Cleaning	0	0	0	0	0	41155.2	41155.2	14048.1	27107.2	0.169606	0.341343	27224.1
	Washing	0	0	0	0	0	14199.6	14199.6	14048.1	151.53	0.000948099	0.989329	0
	Drying	15	54	3625.58	2671.48	2725.48	14068.7	16794.1	13637.8	3156.37	0.0197489	0.812056	1664.86
	Milling	22	79.2	0	0	79.2	13640.2	13719.4	13640.2	79.2	0.000495543	0.994227	0
	Infusion	0	0	0	0	0	13854	13854	2019.05	11835	0.0740496	0.145738	11780.7
	Evaporation	25	90	8053.24	6039.93	6129.93	2019.05	8148.98	2112.38	6036.6	0.0377701	0.25922	3394.08
	Storage	0	0	0	0	0	1764.84	1764.84	1764.84	0	0	1	0
	Mixing 1	15	54	0	0	54	35191.8	35245.8	35081.7	164.057	0.00102648	0.995345	0
	Hydrolysis	0	0	0	0	0	36846.6	36846.6	22187.2	14659.4	0.0917214	0.602152	0
	Centrifugation 1	30	108	0	0	108	22187.2	22295.2	3334.21	18961	0.118636	0.149548	18862.9
	Mixing 2	0	0	0	0	0	73686	73686	73492.8	193.145	0.00120848	0.997379	0
	Centrifugation 2	30	108	0	0	108	73492.8	73600.8	11005.7	62595.1	0.391648	0.149533	62459.8
	Mixing 3	0	0	0	0	0	11297.7	11297.7	11267.8	29.8873	0.000187	0.997355	0
	Centrifugation 3	30	108	0	0	108	11267.8	11375.8	1702.35	9673.44	0.0605253	0.149647	9576.26
	Calcination	0	0	3725.38	3556.04	3556.04	1702.35	5258.4	75.4114	5182.98	0.0324292	0.0143411	2637.65
	Total					12868.7	147383	160252	45.0282	159825	1	0.00266452	138045
